# Supplementary material for: Independent and Combined Associations of Physical Activity, Sedentary Time, and Activity Intensities With Perceived Stress Among University Students: Internet-Based Cross-Sectional Study
Source: PubMed Central journal article supplement (PMC7688394; doi:10.2196/20119), 2020-11-11
Supplement: publichealth_v6i4e20119_app1.pdf [file publichealth_v6i4e20119_app1.pdf]

## CHERRIES Statement—Checklist for Reporting Results of Internet E-Surveys

| Item Category                                                                 | Checklist Item          | Explanation                                                                                                                                                                                                                                                                          |
|-------------------------------------------------------------------------------|-------------------------|--------------------------------------------------------------------------------------------------------------------------------------------------------------------------------------------------------------------------------------------------------------------------------------|
| <b>Design</b>                                                                 |                         |                                                                                                                                                                                                                                                                                      |
|                                                                               | Describe survey design  | In Page 5, under Methods →Study Design and Setting:<br>“...A cross-sectional online study has been implemented at the University of Münster in Germany...”                                                                                                                           |
| <b>IRB (Institutional Review Board) approval and informed consent process</b> |                         |                                                                                                                                                                                                                                                                                      |
|                                                                               | IRB approval            | In Page 5, under Methods →Study Design and Setting:<br>“...Ethical approval has been obtained from the Institutional Review Board...”                                                                                                                                                |
|                                                                               | Informed consent        | In Page 5, under Methods →Study Design and Setting:<br>“...Prior to the online survey, all participants gave informed consent...”                                                                                                                                                    |
|                                                                               | Data protection         | In Page 5, under Methods →Study Design and Setting:<br>“...The email included information on the length of completing the survey (20-30 minutes, 172 items on 15 pages), voluntariness, anonymity, data protection, and incentives (e.g. VIP tickets for sporting events)....”       |
| <b>Development and pre-testing</b>                                            |                         |                                                                                                                                                                                                                                                                                      |
|                                                                               | Development and testing | In Page 5, under Methods →Study Design and Setting:<br>“...The survey was carried out standardized (i.e. without randomization of items) using the evaluation software EvaSys version 8.0 with adaptive questioning (Electric Paper Evaluationssysteme GmbH, Lueneburg, Germany)...” |
|                                                                               |                         |                                                                                                                                                                                                                                                                                      |

| <b>Recruitment process and description of the sample having access to the questionnaire</b> |                              |                                                                                                                                                                                                                                                                                                                                                                                                                                      |
|---------------------------------------------------------------------------------------------|------------------------------|--------------------------------------------------------------------------------------------------------------------------------------------------------------------------------------------------------------------------------------------------------------------------------------------------------------------------------------------------------------------------------------------------------------------------------------|
|                                                                                             | Open survey vs closed survey | In Page 5, under Methods →Study Design and Setting:<br>Closed survey, with “Students received an invitation email and were provided with an individual transaction number (TAN).”                                                                                                                                                                                                                                                    |
|                                                                                             | Contact mode                 | In Page 5, under Methods →Study Design and Setting:<br>“...The resulting 42,630 students were invited by e-mail to take part...”                                                                                                                                                                                                                                                                                                     |
|                                                                                             | Advertising the survey       | In Page 5, under Methods →Study Design and Setting:<br>“...The resulting 42,630 students were invited by e-mail to take part...”                                                                                                                                                                                                                                                                                                     |
| <b>Survey administration</b>                                                                |                              |                                                                                                                                                                                                                                                                                                                                                                                                                                      |
|                                                                                             | Web/E-mail                   | In Page 5, under Methods →Study Design and Setting:<br>“...The resulting 42,630 students were invited by e-mail to take part... The survey was carried out standardized (i.e. without randomization of items) using the evaluation software EvaSys version 8.0 with adaptive questioning...”<br><br>Invitation via email providing a link to a website with the online survey (EvaSys), where responses were automatically captured. |
|                                                                                             | Context                      | In Page 5, under Methods →Study Design and Setting                                                                                                                                                                                                                                                                                                                                                                                   |
|                                                                                             | Mandatory / voluntary        | In Page 5, under Methods →Study Design and Setting:<br>Voluntary, “...The email included information on the length of completing the survey..., voluntariness, anonymity, data protection...”                                                                                                                                                                                                                                        |
|                                                                                             |                              |                                                                                                                                                                                                                                                                                                                                                                                                                                      |

|  |                                          |                                                                                                                                                                                                                                                                                                                                                                                  |
|--|------------------------------------------|----------------------------------------------------------------------------------------------------------------------------------------------------------------------------------------------------------------------------------------------------------------------------------------------------------------------------------------------------------------------------------|
|  | Incentives                               | In Page 5, under Methods →Study Design and Setting:<br>“...Students received an invitation email and were provided with an individual transaction number (TAN). The email included information on the length of completing the survey (20-30 minutes, 172 items on 15 pages), voluntariness, anonymity, data protection, and incentives (e.g. VIP tickets for sporting events).” |
|  |                                          |                                                                                                                                                                                                                                                                                                                                                                                  |
|  | Time/Date                                | In Page 5, under Methods →Study Design and Setting:<br>“...The health survey was carried out during the summer term 2019...”                                                                                                                                                                                                                                                     |
|  |                                          |                                                                                                                                                                                                                                                                                                                                                                                  |
|  | Randomization of items or questionnaires | In Page 5, under Methods →Study Design and Setting:<br>“The survey was carried out standardized (i.e. without randomization of items) using the evaluation software EvaSys version 8.0 ...”                                                                                                                                                                                      |
|  |                                          |                                                                                                                                                                                                                                                                                                                                                                                  |
|  | Adaptive questioning                     | In Page 5, under Methods →Study Design and Setting:<br>“The survey was carried out standardized (i.e. without randomization of items) using the evaluation software EvaSys version 8.0 with adaptive questioning...”                                                                                                                                                             |
|  |                                          |                                                                                                                                                                                                                                                                                                                                                                                  |
|  | Number of items                          | In Page 5, under Methods →Study Design and Setting:<br>“...The email included information on the length of completing the survey (20-30 minutes, 172 items on 15 pages) ...”                                                                                                                                                                                                     |
|  |                                          |                                                                                                                                                                                                                                                                                                                                                                                  |
|  | Number of screens (pages)                | In Page 5, under Methods →Study Design and Setting:<br>“...The email included information on the length of completing the survey (20-30 minutes, 172 items on 15 pages) ...”                                                                                                                                                                                                     |
|  |                                          |                                                                                                                                                                                                                                                                                                                                                                                  |
|  | Completeness check                       | In Page 5, under Methods →Study Design and Setting:<br>“...No completeness check was available. However, incomplete surveys were captured as well...”                                                                                                                                                                                                                            |
|  |                                          |                                                                                                                                                                                                                                                                                                                                                                                  |
|  | Review step                              | In Page 5, under Methods →Study Design and Setting: YES                                                                                                                                                                                                                                                                                                                          |

| <b>Response rates</b>                                       |                                                                                                           |                                                                                                                                                                                                                                           |
|-------------------------------------------------------------|-----------------------------------------------------------------------------------------------------------|-------------------------------------------------------------------------------------------------------------------------------------------------------------------------------------------------------------------------------------------|
|                                                             | Unique site visitor                                                                                       | In Page 5, under Methods →Study Design and Setting:<br>“...Students received an invitation email and were provided with an individual transaction number (TAN)...”                                                                        |
|                                                             |                                                                                                           |                                                                                                                                                                                                                                           |
|                                                             | View rate (ratio of unique survey visitors/unique site visitors)                                          | Not applicable                                                                                                                                                                                                                            |
|                                                             |                                                                                                           |                                                                                                                                                                                                                                           |
|                                                             | Participation rate (ratio of unique visitors who agreed to participate/unique first survey page visitors) | In Page 7, under Results →Participants and Descriptive Data:<br>“A total of 4,189 students participated in this online survey, resulting in an overall response rate of 10% (range 7.2% to 22.1% among the 21 university departments)...” |
|                                                             |                                                                                                           |                                                                                                                                                                                                                                           |
|                                                             | Completion rate (ratio of users who finished the survey/users who agreed to participate)                  | In Page 7, under Results →Participants and Descriptive Data:<br>“A total of 4,189 students participated in this online survey, resulting in an overall response rate of 10% (range 7.2% to 22.1% among the 21 university departments)...” |
|                                                             |                                                                                                           |                                                                                                                                                                                                                                           |
| <b>Preventing multiple entries from the same individual</b> |                                                                                                           |                                                                                                                                                                                                                                           |
|                                                             |                                                                                                           |                                                                                                                                                                                                                                           |
|                                                             | Cookies used                                                                                              | Not applicable                                                                                                                                                                                                                            |
|                                                             |                                                                                                           |                                                                                                                                                                                                                                           |
|                                                             | IP check                                                                                                  | Not applicable                                                                                                                                                                                                                            |
|                                                             |                                                                                                           |                                                                                                                                                                                                                                           |
|                                                             | Log life analysis                                                                                         | Not applicable                                                                                                                                                                                                                            |

|                 |                                                     |                                                                                                                                                                                                                                                                           |
|-----------------|-----------------------------------------------------|---------------------------------------------------------------------------------------------------------------------------------------------------------------------------------------------------------------------------------------------------------------------------|
|                 |                                                     |                                                                                                                                                                                                                                                                           |
|                 | Registration                                        | In Page 5, under Methods → Study Design and Setting:<br>“...Students received an invitation email and were provided with an individual transaction number (TAN)...”                                                                                                       |
| <b>Analysis</b> |                                                     |                                                                                                                                                                                                                                                                           |
|                 | Handling of incomplete questionnaires               | In Page 5, under Measurements → Physical Activity:<br>For example in Physical Activity, “...Missing PA or ST data were considered as completely missing for this case and not considered for statistical analysis (n=80)...”                                              |
|                 | Questionnaires submitted with an atypical timestamp | Not applicable                                                                                                                                                                                                                                                            |
|                 | Statistical correction                              | In Page 6, under Measurements → Perceived Stress:<br>“...Ipsative mean imputation was used (n=70) when not more than one item of the complete scale was missing. In case of two or more missing items, the subject was not considered for statistical analyses (n=14)...” |
|                 |                                                     |                                                                                                                                                                                                                                                                           |
